# Supplementary material
Source: PubMed Central journal article supplement (PMC9035109)
Supplement: NIHMS1783250-supplement-S1.pdf [file NIHMS1783250-supplement-S1.pdf]

**Neuron, Volume 110**

**Supplemental information**

**Suppression of premature transcription**

**termination leads to reduced mRNA**

**isoform diversity and neurodegeneration**

**Geneva R. LaForce, Jordan S. Farr, Jingyi Liu, Cydni Akesson, Evren Gumus, Otis Pinkard, Helen C. Miranda, Katherine Johnson, Thomas J. Sweet, Ping Ji, Ai Lin, Jeff Coller, Polyxeni Philippidou, Eric J. Wagner, and Ashleigh E. Schaffer**

**A** Pulldown:FlagHis

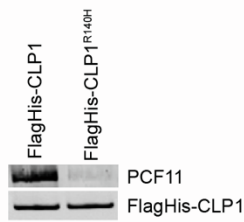

**B**

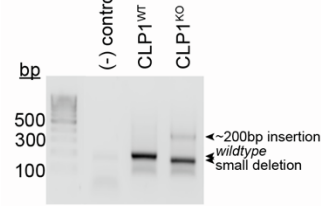

**C**

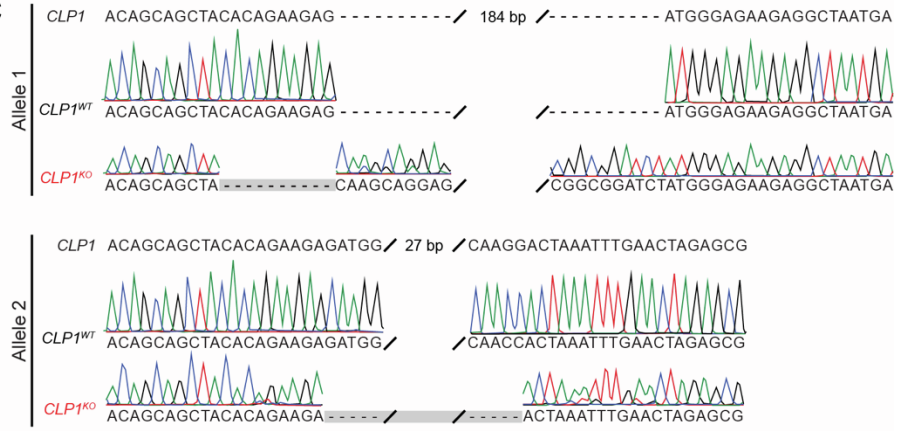

**D**

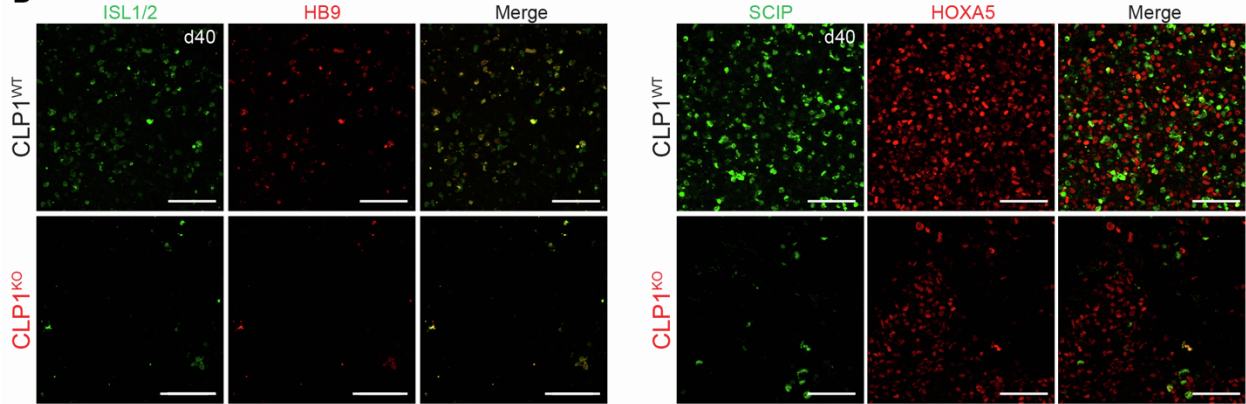

**E**

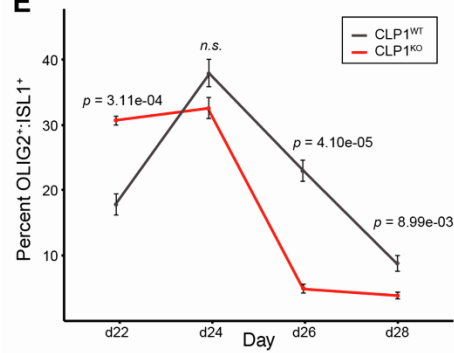

**F**

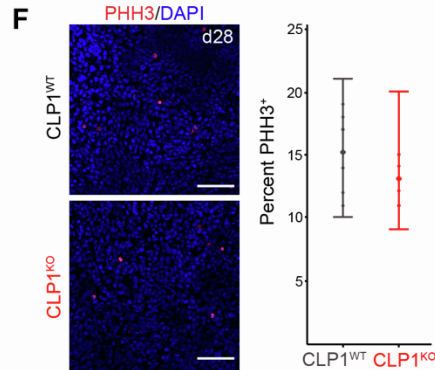

**Figure S1. CLP1 knockout human embryonic stem cells have bi-allelic frameshift variants, and express mature motor neuron markers of phrenic identity upon directed differentiation; related to Figure 1.**

- A. CLP1 p.R140H has reduced affinity for PCF11 compared to wild type (Schaffer et al., 2014).
- B. PCR amplification of *CLP1* after CRISPR/Cas9 demonstrates the absence of a *wildtype* allele and the presence of a bi-allelic mutation consisting of a ~200-base pair (bp) insertion and a small deletion.
- C. Sanger sequencing chromatograms from H9 human embryonic stem cells (hESCs) subjected to CRISPR/Cas9 genome editing to induce bi-allelic indels in exon 2 of *CLP1*. Unedited isogenic controls ( $CLP1^{WT}$ ) have the reference genotype, while CLP1 knockout ( $CLP1^{KO}$ ) hESCs have a compound heterozygous mutation in *CLP1* consisting of a 37-base pair (bp) deletion and a 204-bp insertion.
- D. Immunofluorescence staining for motor neuron identity markers ISL1/2, HB9, SCIP and HOXA5 in  $CLP1^{KO}$  and isogenic  $CLP1^{WT}$  hESC-derived motor neuron cultures at day (d) 35 of differentiation. Scale bar: 50  $\mu$ m.
- E.  $CLP1^{KO}$  motor neuron cultures contain a higher percentage of OLIG2 and ISL1/2 co-positive cells at day (d) 22 of differentiation but lower percentages of OLIG2 and ISL1/2 co-positive cells at later time points compared to  $CLP1^{WT}$  motor neuron cultures. *n.s.*, non-significant ( $p > 0.05$ ); two-sided Student's t-test. Representative images shown from three clonal hESC-derived motor neuron lines per genotype. Scale bar: 50  $\mu$ m.
- F. Analysis of total proliferation by p-Histone H3 (PHH3) immunostaining in  $CLP1^{WT}$  and  $CLP1^{KO}$  motor neuron cultures at day (d) 28 showed similar levels of proliferation. two-sided Student's t-test. Representative images shown from three clonal hESC-derived motor neuron lines per genotype. Scale bar: 50  $\mu$ m.

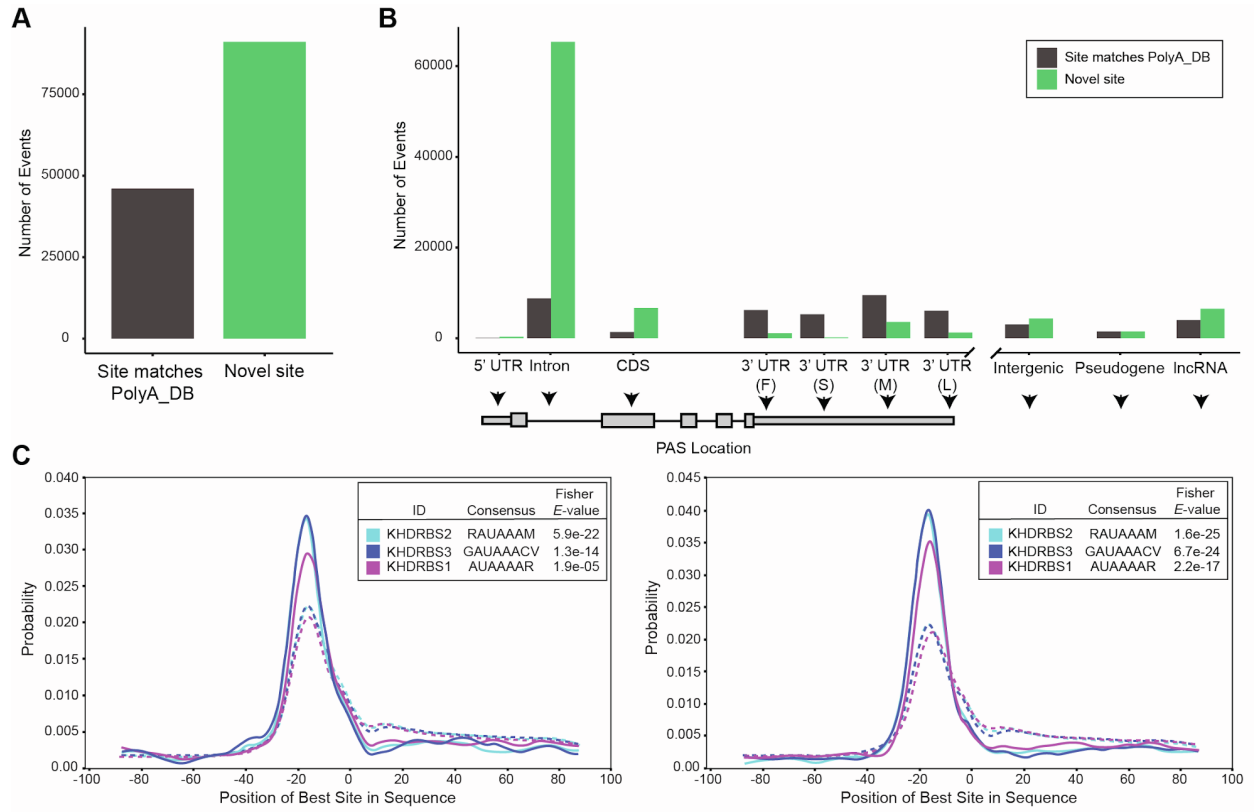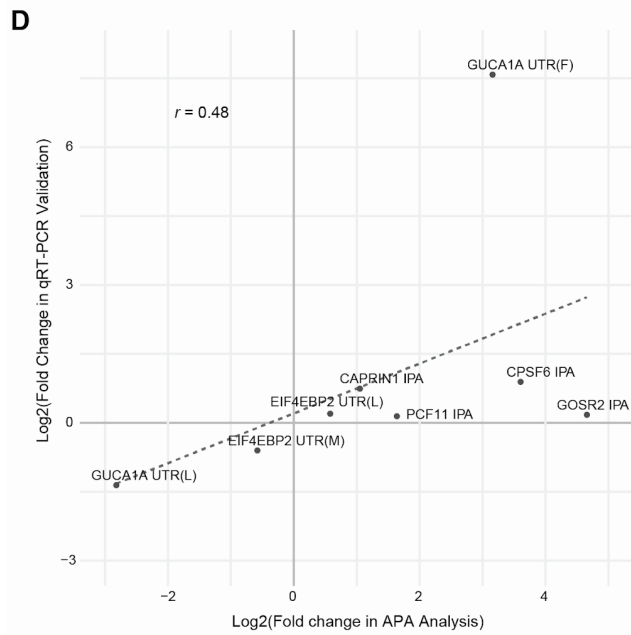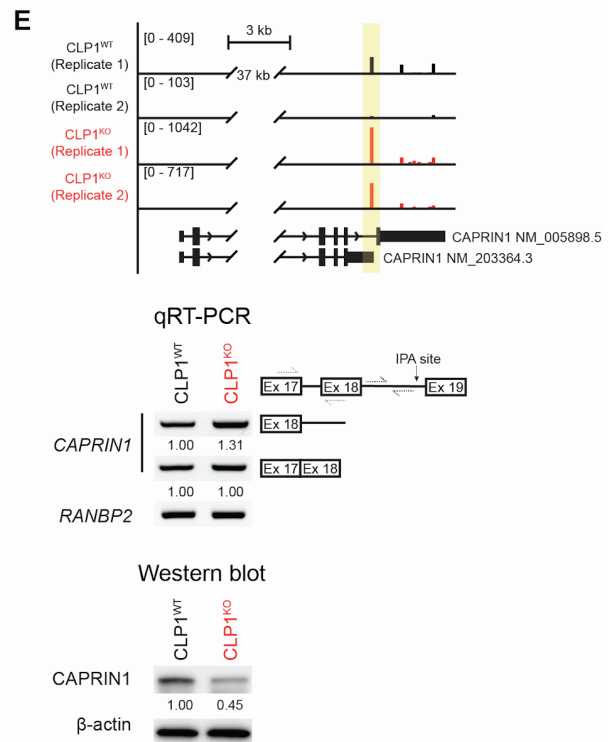

**Figure S2. A motor neuron-specific database of poly(A) sites enables quantitative understanding of polyadenylation at thousands of previously unannotated loci; related to Figure 2.**

- A. Annotation of novel polyadenylation sites (PASs) reveals  $\frac{2}{3}$  of those used in motor neurons are not previously annotated in the PolyA\_DB database (91,089 novel sites, 46,032 PolyA\_DB-matching sites).
- B. Subdividing novel and previously annotated polyadenylation sites (PASs) in stem cell-derived motor neurons by intragenic position reveals a majority of novel PASs are located within introns. 3' untranslated region (UTR) subdivisions are "F", "S", "M", and "L" for first, single, middle, and last, respectively. Intergenic = 10 kb beyond the annotated end of genes.
- C. Positional motif enrichment analysis of polyadenylation sites with increased (left) and decreased (right) usage in CLP1<sup>KO</sup> compared to CLP<sup>WT</sup> hESC-derived motor neurons. Plots are centered on the cleavage site, the AU rich element in the -20 position indicates the polyadenylation signal.
- D. Validated alternative polyadenylation events correlate in fold change by PAC-Seq and qRT-PCR (n = 8 target genes, Pearson  $r = 0.48$ ).
- E. Genome browser tracks (top) of CLP1<sup>KO</sup> and CLP1<sup>WT</sup> hESC-derived motor neuron 3'-end sequencing reads mapped to *CAPRIN1* at a differentially used intronic polyadenylation (IPA) site. Increased usage of IPA site (yellow). qRT-PCR validation (middle) of IPA site and total gene expression. Representative gel images shown with qRT-PCR values below, n = 3. Western blot (bottom) for CAPRIN1 expression in CLP1<sup>KO</sup> and isogenic CLP1<sup>WT</sup> H9 hESC-derived motor neurons. Beta actin, loading control.

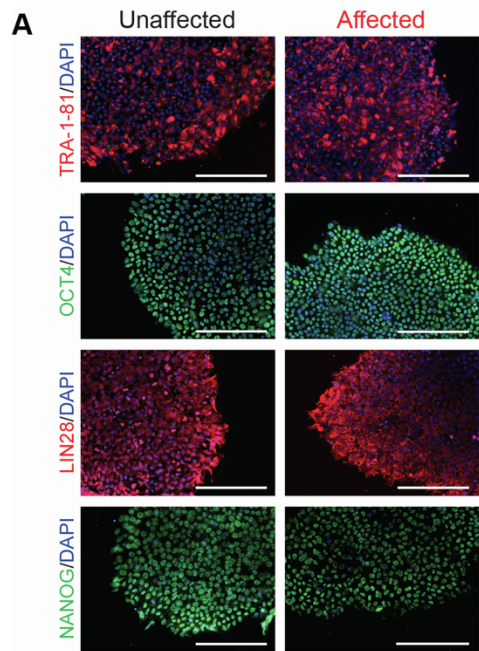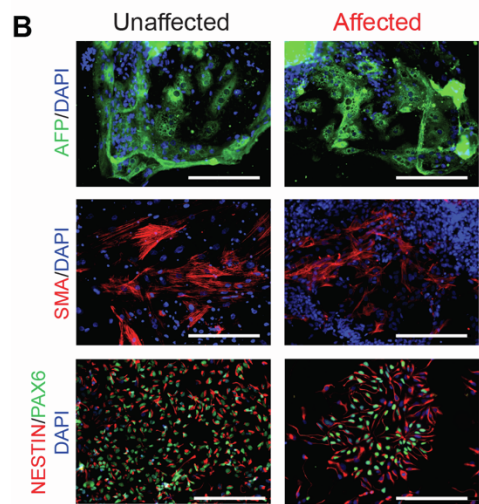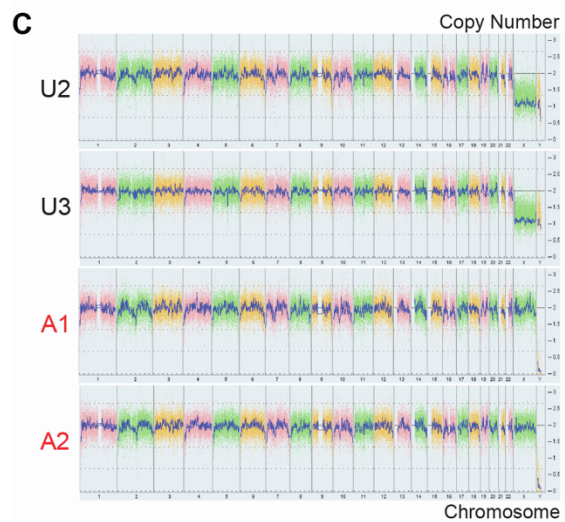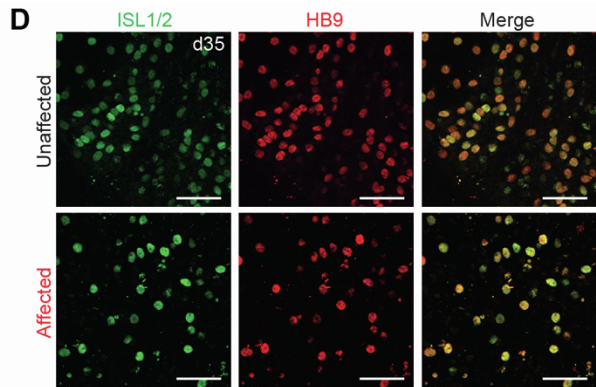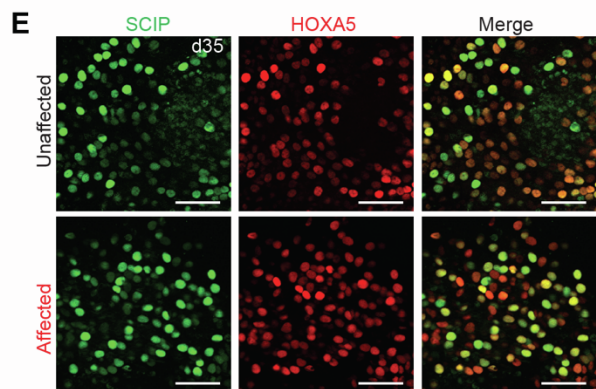

**Figure S3. CLP1 p.R140H does not alter fibroblast reprogramming or motor neuron cell type specification; related to Figure 3.**

- A. Induced pluripotent stem cells derived from a patient with PCH10 (Affected) and their parent (Unaffected) immunostained for pluripotency markers TRA-1-81, OCT4, LIN28, and NANOG, and counterstained with DAPI. n = 2 clonal replicates per individual, representative images shown. Scale bar: 100  $\mu$ m.
- B. Differentiated Affected and Unaffected iPSCs stained for markers of the endoderm,  $\alpha$ -fetoprotein (AFP); mesoderm, smooth muscle actin (SMA); ectoderm, NESTIN and PAX6; counterstained with DAPI. n = 3 clonal replicates per individual, representative images shown. Scale bar: 100  $\mu$ m.
- C. Chromosome copy number analysis of Affected (A1, A2) and Unaffected (U2, U3) iPSCs. n = 2 clonal replicates per individual shown.
- D. Immunofluorescence staining for motor neuron specific transcription factors ISL1/2 and HB9 in Affected and Unaffected motor neuron cultures at day (d) 35 of differentiation. Representative images shown from two clonal iPSC-derived motor neuron lines per individual. Scale bar: 50  $\mu$ m.
- E. SCIP and HOXA5 immunostaining in Unaffected and Affected motor neuron cultures. n = 2 clonal replicates per individual, representative images shown. Scale bar: 50  $\mu$ m.





**Figure S4. Validation of differential polyadenylation site usage in CLP1. p.R140H motor neurons; related to Figure 4.**

- A. qRT-PCR validations of alternative polyadenylation events show concordance with the bioinformatic findings in PCH10 patient-derived motor neurons (Pearson  $r = 0.61$ ).
- B. Genome browser tracks of Unaffected (U2, U3) and Affected (A1, A2) iPSC-derived motor neuron 3'-end sequencing and RNA-sequencing reads mapped to *KLC1* at differentially used intronic polyadenylation (IPA) and distal 3' UTR sites. Increased usage of PAS (yellow), decreased usage of PAS (blue). qRT-PCR validation for these two events is shown in (A),  $n = 3$ .
- C. Genome browser tracks of Unaffected (U2, U3) and Affected (A1, A2) iPSC-derived motor neuron 3'-end sequencing and RNA-sequencing reads mapped to *GRID1* at a novel, differentially used intronic polyadenylation (IPA) site. Decreased usage of PAS (blue), increased RNA-seq read density (yellow). qRT-PCR validation for the IPA event shown in (A),  $n = 3$ .

**A**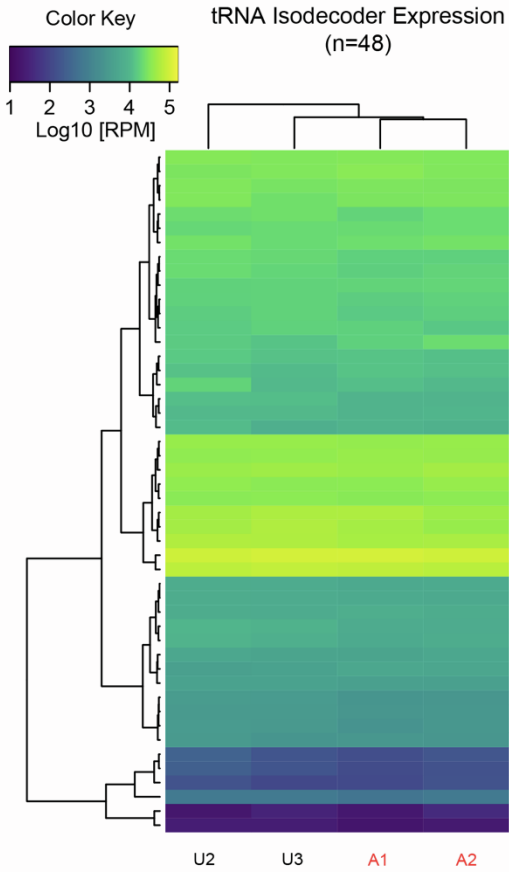

tRNA Isodecoder Differential Expression

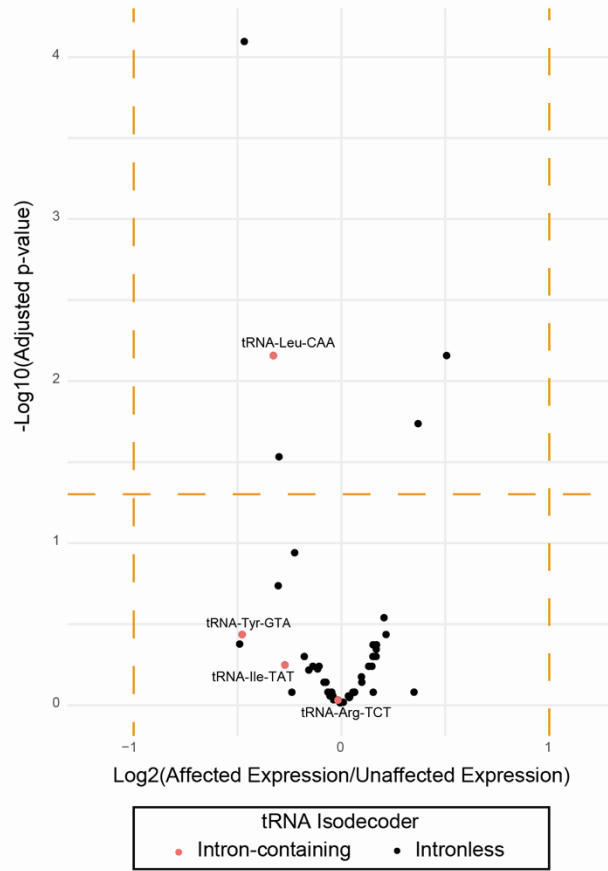**B**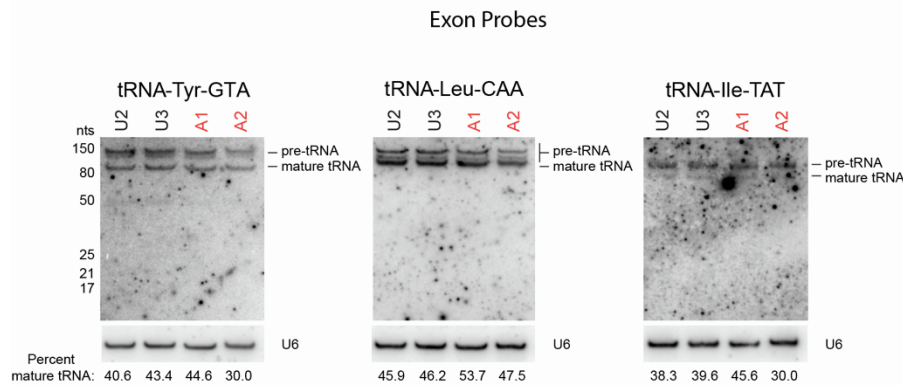**C**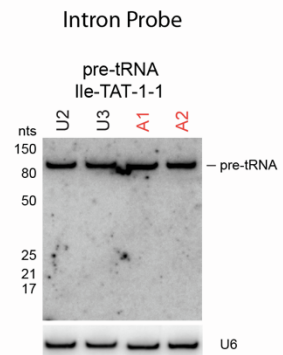

**Figure S5. PCH10 motor neurons do not have altered tRNA expression or detectable intron fragment accumulation; related to Figure 4.**

- A. Pontocerebellar hypoplasia (PCH10) induced pluripotent stem cell derived-motor neurons (Affected, A1, A2) show nearly identical tRNA isodecoder gene expression levels to familial controls (Unaffected, U2, U3). Heat map of tRNA isodecoder reads per million (RPM) detected by tRNA sequencing (right) from two independent induced pluripotent stem cell (iPSC) clones per individual. Volcano plot of differential expression showing 5 of 48 isodecoders had a marginal change in Affected motor neurons (left).
- B. Northern blots for intron-containing tRNAs in PCH10 iPSC-derived motor neurons (Affected, A1, A2) compared to familial controls (Unaffected, U2, U3) revealed no change in the ratio of spliced to pre-tRNAs or tRNA exon fragment accumulation. n = 2 independent clones per individual. Quantification below.
- C. Northern blot for tRNA IleTAT using an intron probe found no differences in pre-tRNA levels or intron fragment accumulation in PCH10 iPSC-derived motor neurons (Affected, A1, A2) compared to familial controls (Unaffected, U2, U3). n = 2 independent clones per individual.

**A**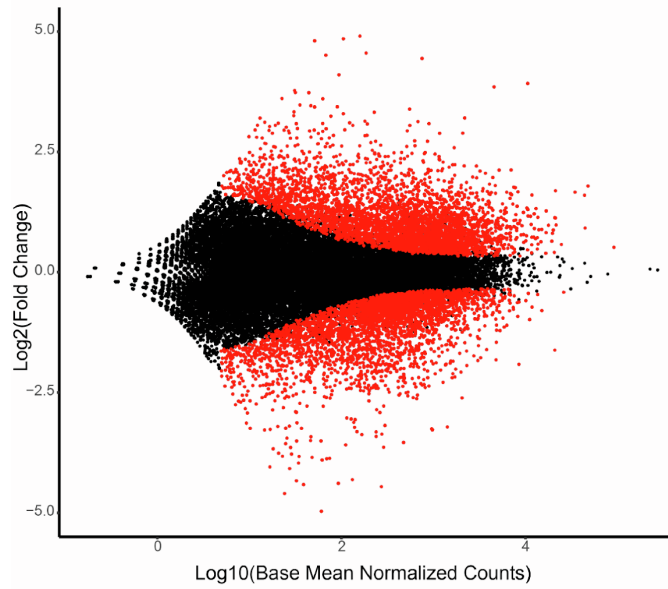**B**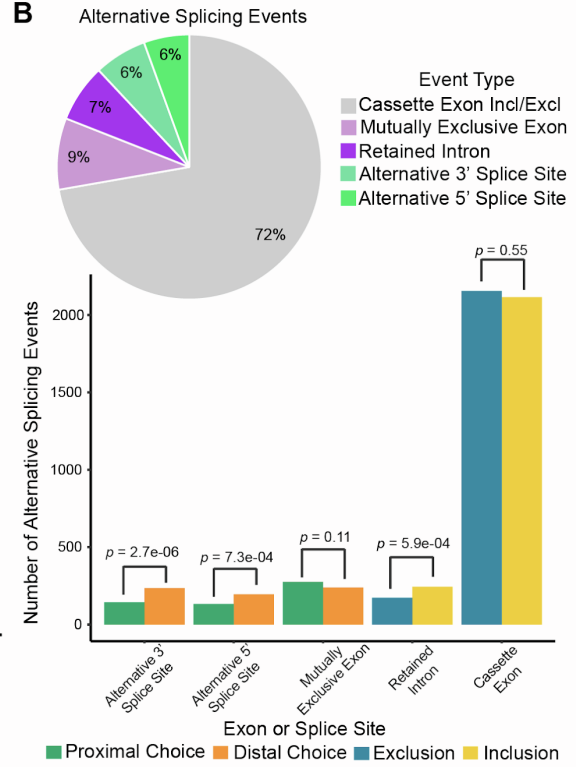**C**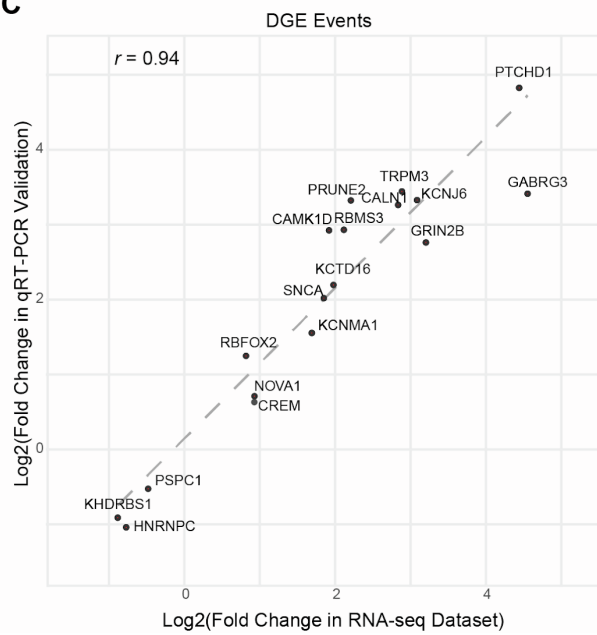**D**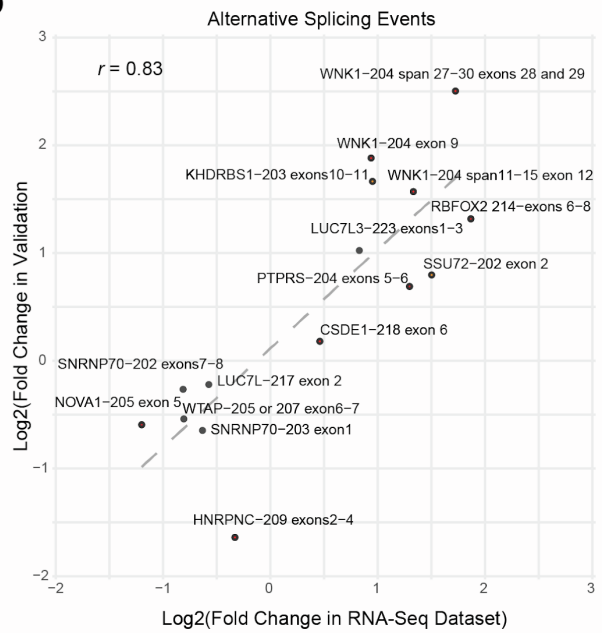

**Figure S6. Overview of differential gene expression and splicing events, validated by PCR-based methods; related to Figure 5.**

- A. Thousands of genes show differential expression in induced pluripotent stem cell derived motor neurons from patients with pontocerebellar hypoplasia type 10 (Affected) across a broad range of base mean expression without visible bias toward up- or downregulation.
- B. Breakdown of differential splicing events by type (two-sided Binomial Test). Cassette exon inclusion/exclusion events make up the vast majority of alternative splicing events in the Affected motor neurons and do not show a preference for inclusion or exclusion; however, intron retention and distal splicing choice is slightly elevated. Incl, inclusive; Excl, exclusive.
- C. Validated differentially expressed genes strongly correlate in fold change by total RNA-seq and qRT-PCR ( $n = 18$  target genes, Pearson  $r = 0.94$ ). DGE, differential gene expression.
- D. Splicing changes detected in Affected motor neurons by bioinformatic analysis correlated strongly with RT-PCR/Tapestation validation ( $n = 15$  target genes, Pearson  $r = 0.83$ ). Hyphenated numbers correspond to Ensembl isoform identifiers.

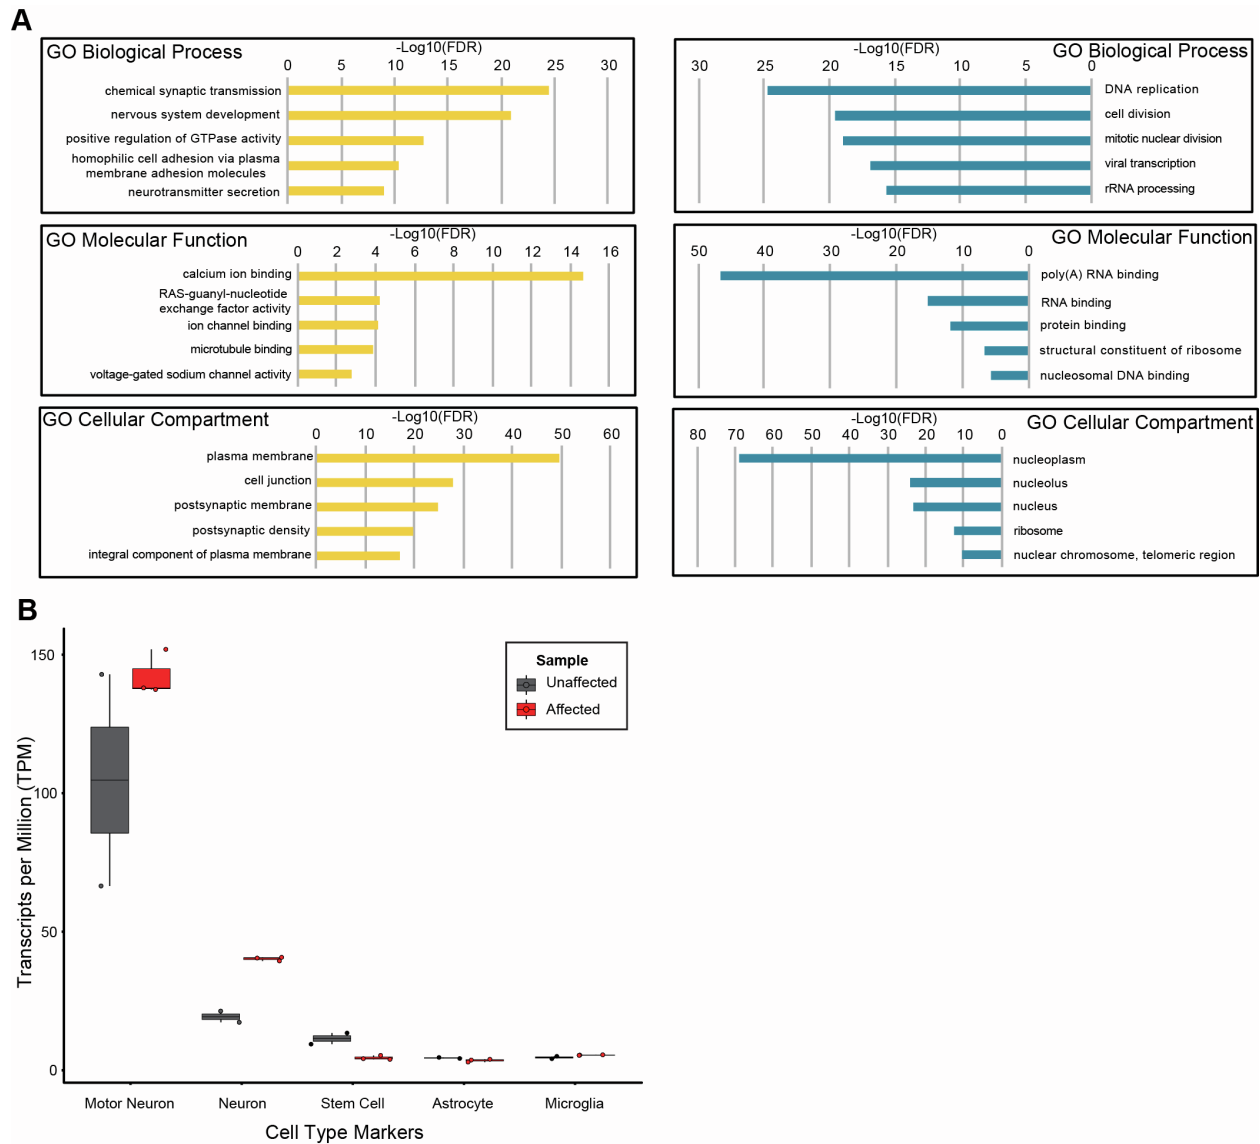

**Figure S7. Gene ontology (GO) terms enriched in induced pluripotent stem cell-derived motor neurons from patients with pontocerebellar hypoplasia type 10 (Affected) motor neurons are not caused by changes in cell type composition; related to Figure 6.**

- Top five biological processes, molecular function, and cellular compartment GO terms enriched from genes differentially expressed in Affected motor neurons, ranked by false discovery rate (FDR). Terms enriched in upregulated genes (yellow) and downregulated genes (blue), respectively.
- Geometric mean expression of cell type specific marker genes produces no statistically significant differences in cell type abundance and shows that motor neuron markers are expressed at a much higher proportion than markers for other potentially non-motor neuron cell types.

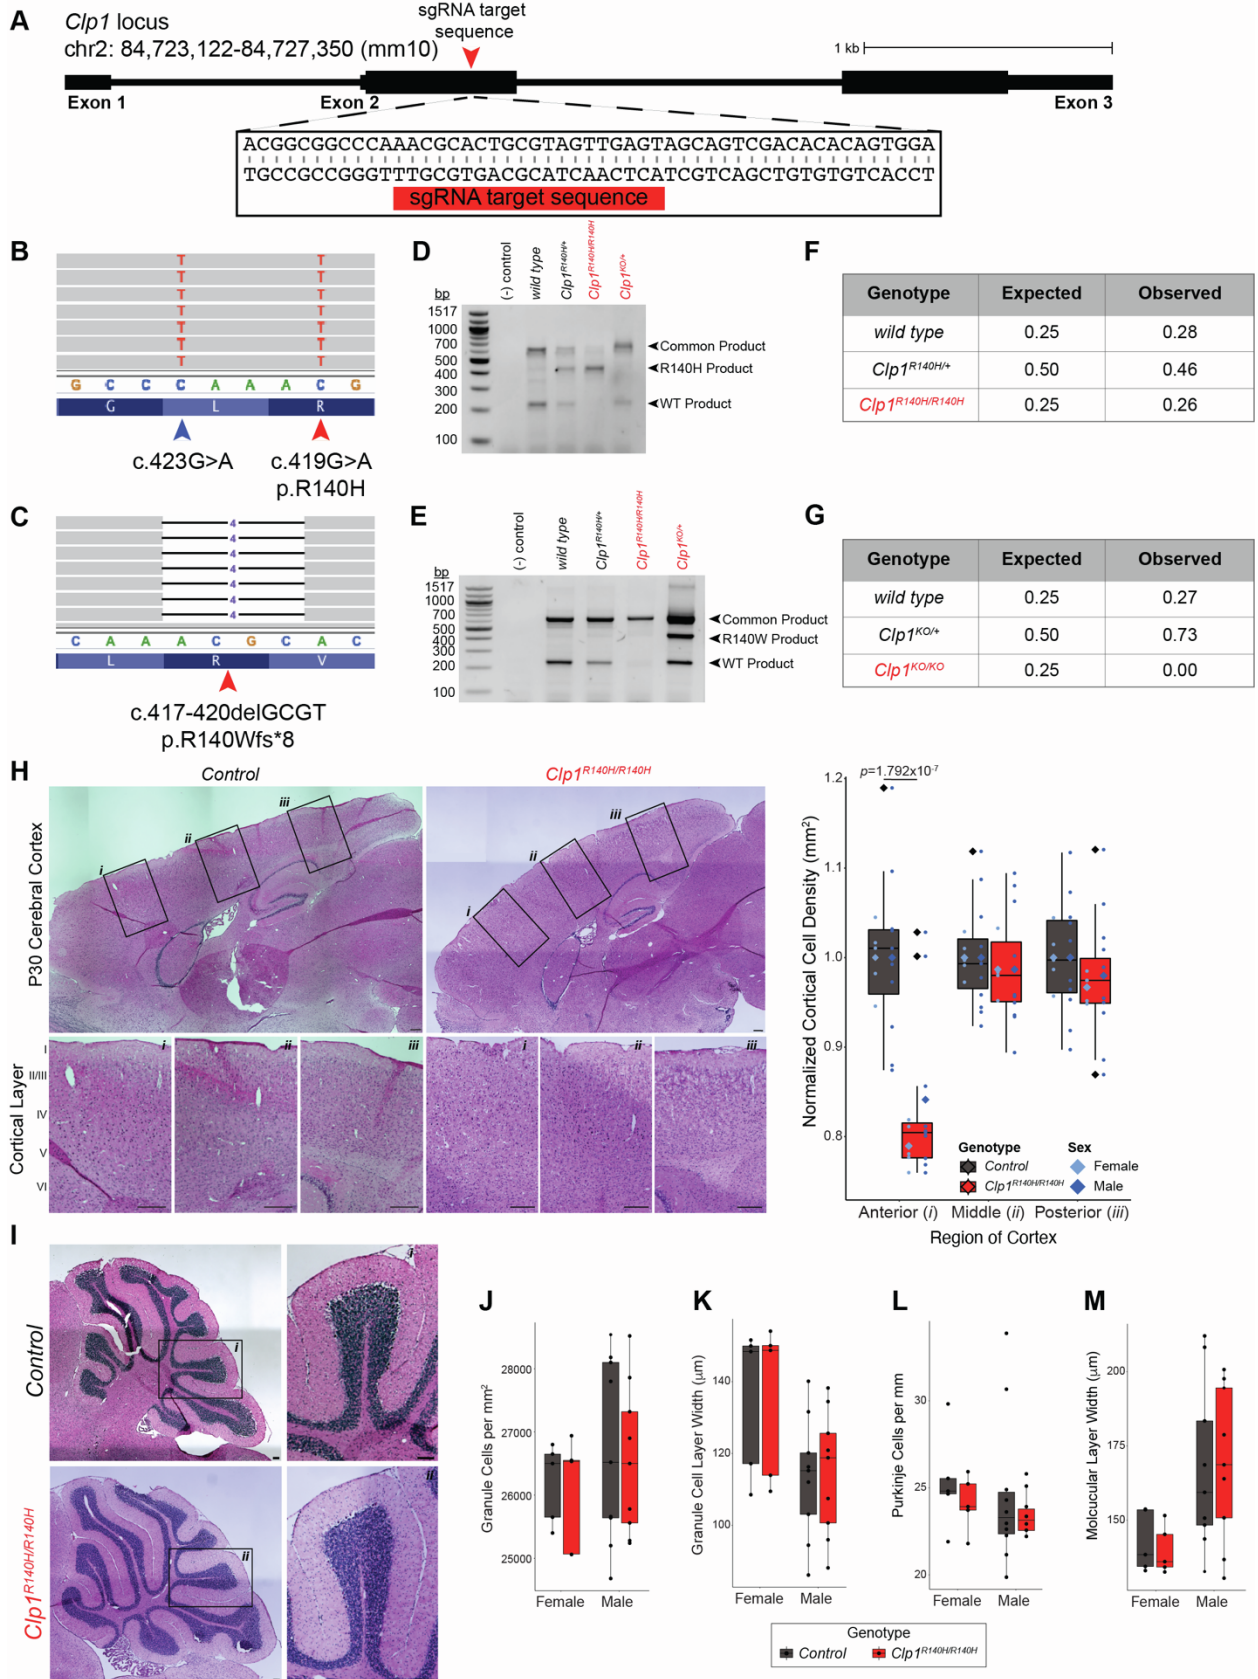

**Figure S8. Generation of *Clp1* p.R140H mutant mice and characterization of *Clp1*<sup>R140H/R140H</sup> brain features; related to Figure 7.**

- A. Strategy for targeting the murine *Clp1* locus with CRISPR/Cas9 genome editing to introduce p.R140H. Scale bar: 1 kb.
- B, C. Confirmation of edited *Clp1* alleles, and mosaicism, determined by next generation sequencing. Representative sequencing reads in B demonstrate c.419G>A (p.R140H, *Clp1*<sup>R140H/R140H</sup>) (red arrow) and synonymous PAM site c.423G>A variant (blue arrow). Representative sequencing reads in C demonstrate c.417-420delGCGT (p.R140Wfs\*8) (red arrow), resulting in a *Clp1* null allele (*Clp1*<sup>KO/KO</sup>).
- D, E. Allele-specific polymerase chain reaction (AS-PCR) for *Clp1* variants (see **Data File S1L**). Representative gel image in D demonstrates primer specificity for *Clp1* p.R140H. Representative gel image in E demonstrates primer specificity for *Clp1* p.R140Wfs\*8.
- F. Litter ratio analysis for *Clp1*<sup>R140H/R140H</sup> mice demonstrates expected ratios of *wild type*, *Clp1*<sup>R140H/+</sup>, and *Clp1*<sup>R140H/R140H</sup> offspring, n = 50 mice.
- G. Litter ratio analysis for *Clp1*<sup>KO/KO</sup> mice are consistent with embryonic lethality, n = 22 mice.
- H. Hematoxylin and eosin histochemistry of sagittal sections from postnatal day (P) 30 control and *Clp1*<sup>R140H/R140H</sup> mutant brains. Scale bar: 500 μm. Boxes *i-iii* represent areas of the isocortex assessed for changes in cortical cell density. Scale bar: 200 μm. Quantification, right. Boxplot represents the distribution of normalized cortical cell density for n = 3 mice per genotype, black diamonds represent outliers, colored circles represent the cell density for 5 matched sections from individual mice divided by sex, colored diamonds represent the average cell density of 5 matched sections from sex-matched mice. Whiskers extend the full range of the data, excluding outliers (>1.5x interquartile range); two-sided Student's t-test.
- I. Hematoxylin and eosin histochemistry of sagittal brain sections from postnatal day (P) 30 control (top) and *Clp1*<sup>R140H/R140H</sup> mutant mice (bottom). Scale bar: 500 μm. Boxes *i* and *ii* are representative areas of the cerebellar folia assessed for changes in morphology and cell density. Scale bar: 200 μm.
- J-M. Quantification of cerebellar folia morphology and cell density in control and *Clp1*<sup>R140H/R140H</sup> littermates show no differences. (J) Granule cell density, (K) Granule cell layer width, (L) Purkinje cell density, (M) Molecular layer width. Boxplots represent the distribution of measurements for each feature for n = 3 mice per genotype, individual points represent measurements collected for 5 matched sections from individual mice divided by sex. Whiskers extend the full range of the data, excluding outliers (>1.5x interquartile range); two-sided Student's t-test.
